# Supplementary material for: Pre- and peri-implantation Zika virus infection impairs fetal development by targeting trophectoderm cells
Source: PubMed Central journal article supplement (PMC6744420; doi:10.1038/s41467-019-12063-2), 2019-09-13
Supplement: 41467_2019_12063_MOESM1_ESM.pdf [file 41467_2019_12063_MOESM1_ESM.pdf]

**SUPPLEMENTARY INFORMATION.**

**Title: Pre- and Peri-implantation Zika Virus Infection Impairs Fetal Development by Targeting Trophectoderm Cells**

**First Authors:** Tan, Lacko, Zhou et al.

# Supplementary Figure 1

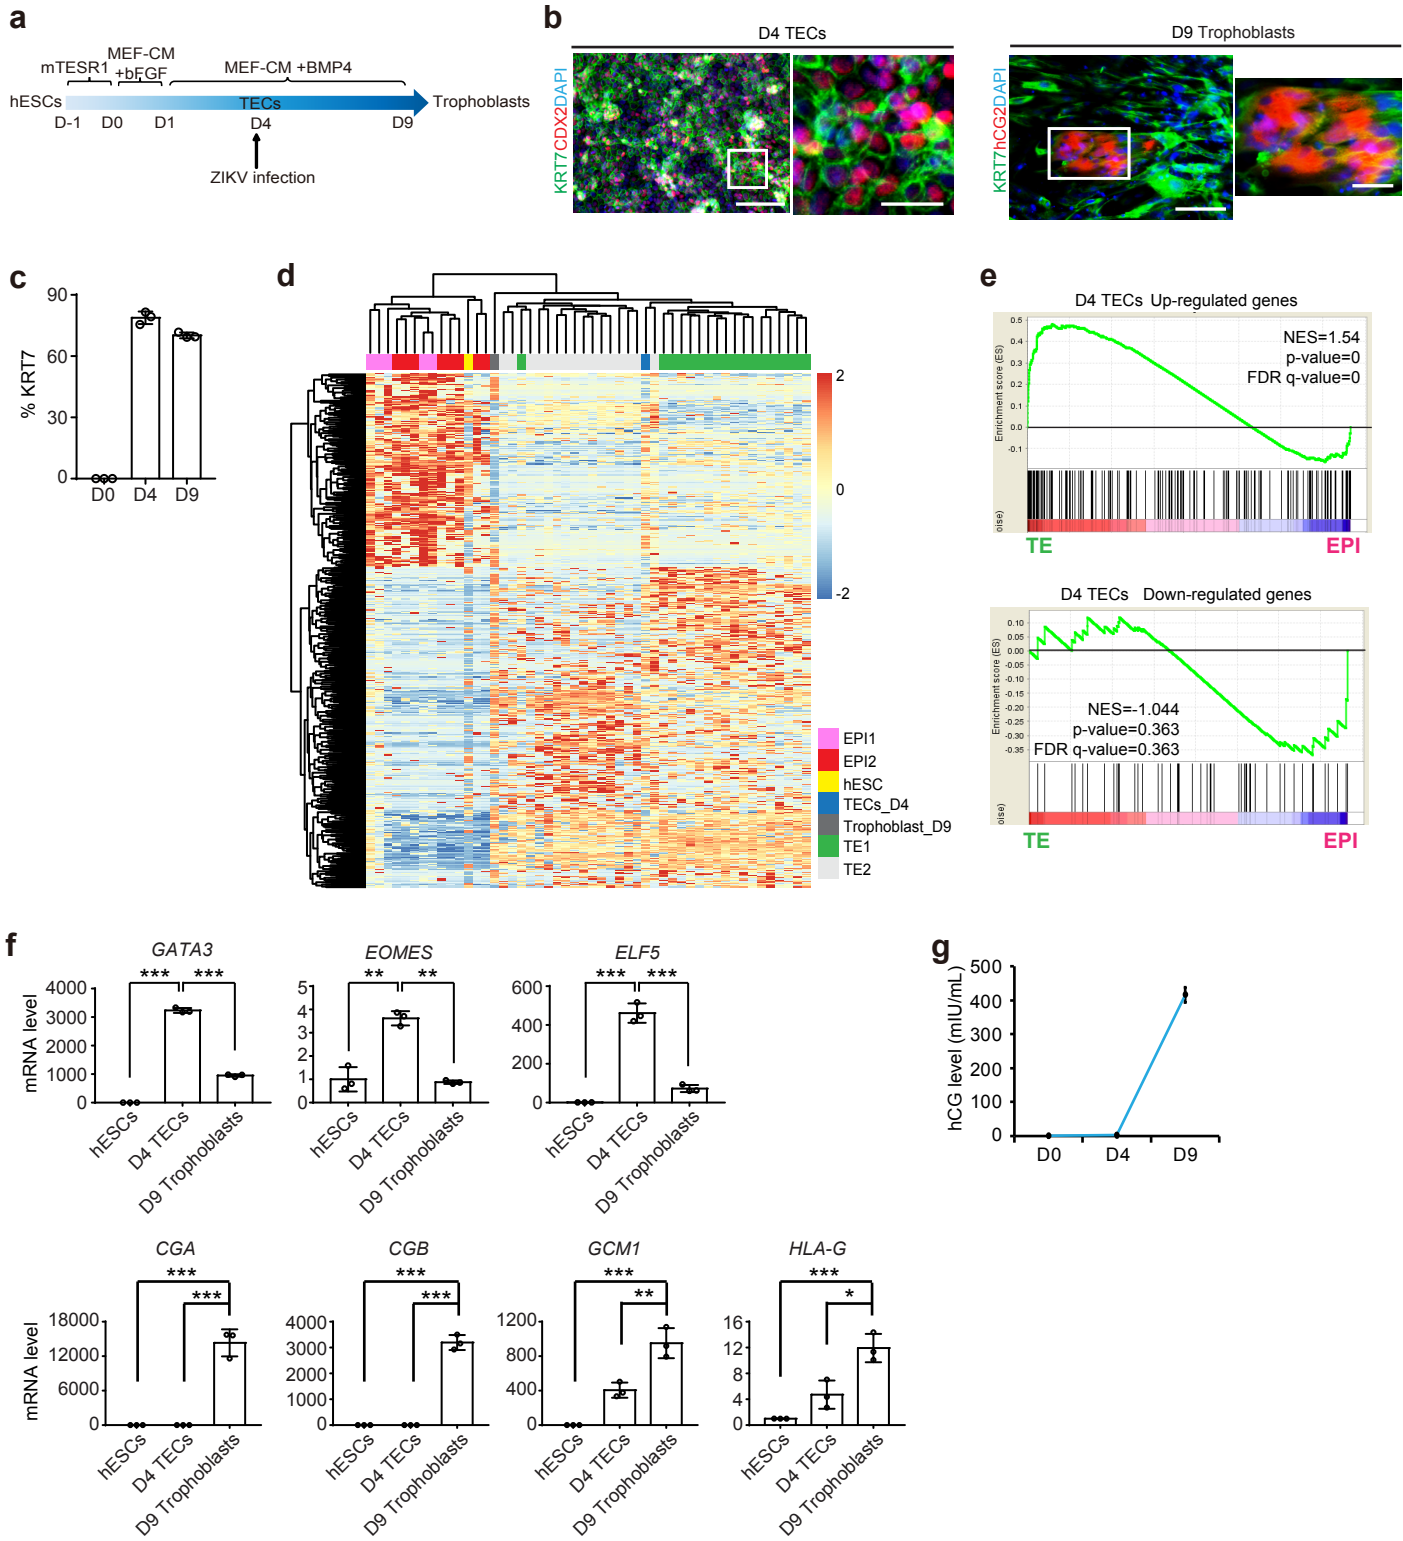

**Supplementary Figure 1: Characterization of trophoctoderm (TE) cells derived from hESCs. Related with Figure 2.**

**a**, Scheme of TE cells generation from hESCs. **b,c**, Immunostaining of KRT7, CDX2 and hCG2 in hESC-derived TECs. **b**. In each panel, left photo is in lower magnification (Scale bar=100  $\mu$ m), while right photo is higher magnification (Zoom image, scale bar=500  $\mu$ m. Percentage of KRT7+ cells was quantified in **c**. N=3. **d**, Heatmap and clustering analysis of gene expression profile in hESC-derived TECs, comparing with trophoctoderm and epiblast cells isolated from human blastocysts (Supplemental Table 4). Upregulated genes are demarked by red color and downregulated genes are demarked by blue color. **e**, GSEA analysis showed gene set upregulated in TECs vs. hESCs are highly enriched in trophoctoderm isolated from human blastocysts (upper panel) and gene set downregulated in TECs vs. hESCs are highly enriched in epiblast cells isolated from human blastocysts (lower panel). **f**, qRT-PCR analysis of TECs marker genes (*EOMES*, *GATA3*, *ELF5* in upper panel) and trophoblast marker genes (*CGA*, *CGB*, *GCM1*, *HLA-G* in lower panel) in hESC- day 4 TECs and day 9 trophoblasts. N=3. **g**, ELISA analysis of hCG in hESC-derived TECs and trophoblasts. N=3. Data are presented as mean $\pm$ standard deviation. *P* values were calculated by unpaired two-tailed Student's *t* test. \**P*< 0.05, \*\**P*< 0.01, and \*\*\**P*< 0.001. Source data for Supplementary Figure 1c and 1f-g are provided as a Source Data file.

# Supplementary Figure 2

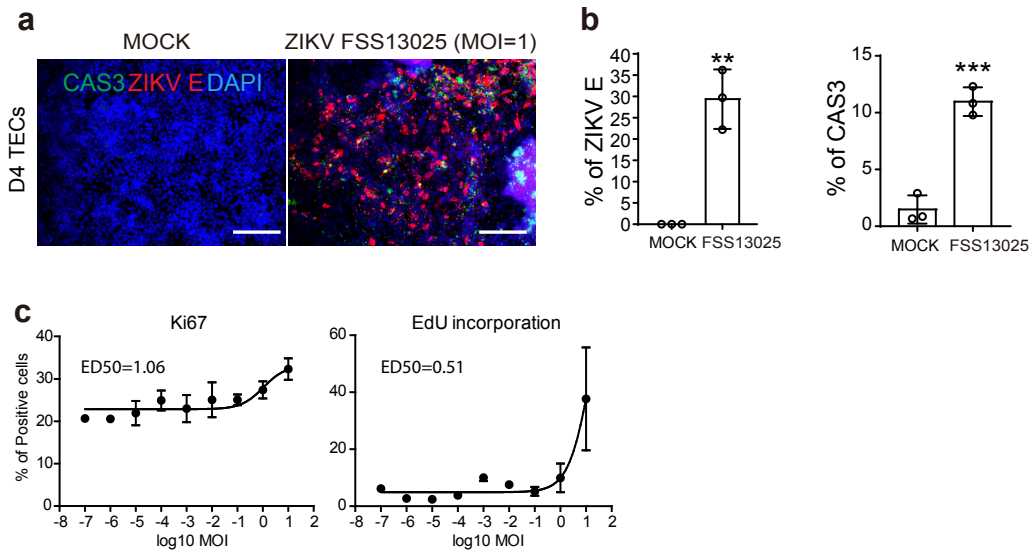

**Supplementary Figure 2: Effects of ZIKV infection on TECs. Related with Figure 2.**

**a**, Immunostaining of ZIKV E in TECs at 3 days post-infection with FSS13025 strain (MOI=1). Scale bar=100  $\mu$ m. **b**, The percentage of ZIKV infected cells (left panel) and CAS3+ cells (right panel) were quantified in **a**. N=3. **c**, Quantification of the percentage of Ki67+ cells or EdU+ cells of TECs at 72 hpi with ZIKV (MR 766, MOI ranging from  $10^{-7}$  to  $10^1$ ). Data are presented as mean $\pm$ -standard deviation. *P* values were calculated by unpaired two-tailed Student's *t* test. \*\**P*< 0.01, and \*\*\**P*< 0.001. Source data for Supplementary Figure 2b are provided as a Source Data file.

# Supplementary Figure 3

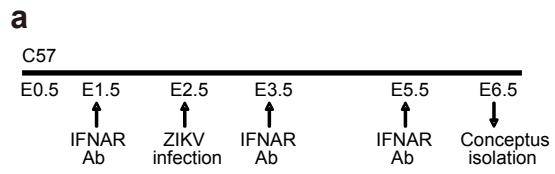

**b**

|                       | MOCK  | IFNAR Ab + MOCK | IFNAR Ab + ZIKV |
|-----------------------|-------|-----------------|-----------------|
| # of Pregnant         | 8     | 5               | 8               |
| # of Not pregnant     | 1     | 1               | 6               |
| Total plugs           | 9     | 6               | 14              |
| Pregnant/plugged rate | 88.9% | 83.3%           | 57.1%           |

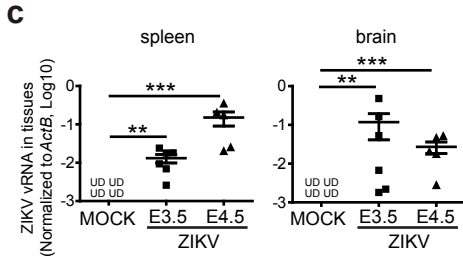

**Supplementary Figure 3: ZIKV infection of mouse models. Related to Figure 4.**

**a**, Scheme of ZIKV infection in pregnant C57 female mice treated with anti-IFNAR neutralizing antibody. **b**, Pregnancy rate of infected mice in **a**. **c**, qRT-PCR quantification of ZIKV vRNA in spleen and brain associated with Fig. 4a. N=4 for MOCK, N=6 for E3.5, and N=5 for E4.5. Data are presented as mean+/-standard deviation. *P* values were calculated by one-way repeated-measures ANOVA or two-way repeated-measures ANOVA with a Bonferroni test. \*\**P*< 0.01, and\*\*\**P*< 0.001. Source data for Supplementary Figure 3b-c are provided as a Source Data file.

**Supplementary Table 1. Summary of the published studies on ZIKV and human placentas or trophoblasts.**

| <b>Cells</b>                                                                                                                                     | <b>Virus Strain</b>         | <b>Virus Titre</b>                             | <b>PMID</b> |
|--------------------------------------------------------------------------------------------------------------------------------------------------|-----------------------------|------------------------------------------------|-------------|
| Trophoblast progenitors (7.3 and 15.6 weeks)<br>Cytotrophoblasts (15.6-21.1 weeks) and (37.2 weeks)<br>Placental villus explants (7.5-8.4 weeks) | MR766                       | MOI=0.001-3                                    | 27443522    |
| Placental microphage                                                                                                                             | PRVABC59                    | MOI=1                                          | 27247001    |
| Human placenta villi, decidua, and fetal membrane explants from three donors (age 21–23 weeks gestation)                                         | Paraiba 2015                | 5x10 <sup>6</sup> FFU                          | 29386359    |
| Primary villous CTB<br>Trophoblasts derived from hESCs                                                                                           | MR766,<br>FSS13025          | MOI =<br>0.000027 to<br>1.08                   | 28193876    |
| Decidual and chorionic villus organ cultures                                                                                                     | MP1751                      | 5x10 <sup>4</sup> per well in 48-well plates   | 27974560    |
| Primary HC and trophoblasts dissected from membrane-free villous placenta                                                                        | PRVABC59                    | MOI=1                                          | 28776046    |
| human placental macrophages and placental villous fibroblasts                                                                                    | FSS13025, MexI-44 and MR766 | MOI=1                                          | 27595140    |
| Human placental (7-12 weeks)                                                                                                                     | ZIKV Brazil                 | 6x10 <sup>10</sup> RNA copies ml <sup>-1</sup> | 27759009    |
| Human placental trophoblasts isolated from termed birth (37-41 weeks)                                                                            | ZIKV-FLR                    | MOI=0.1-1                                      | 28128342    |
| Human placental explants from second trimester (13-24 weeks gestation)                                                                           | ZIKV Brazil                 | 5x10 <sup>5</sup> FFU ml <sup>-1</sup>         | 28910635    |
| Midgestation chorionic villi(17-23 weeks)                                                                                                        | ZIKV-FLR                    | 5x10 <sup>5</sup> FFU ml <sup>-1</sup>         | 28784796    |
| Trophoblast cell lines<br>BeWo, JEG3, JAR, HTR8<br>Term placentas                                                                                | MR766<br>FSS13025           |                                                | 27066743    |



|                                                                                                                                                                                   |                                                                                         |                   |          |
|-----------------------------------------------------------------------------------------------------------------------------------------------------------------------------------|-----------------------------------------------------------------------------------------|-------------------|----------|
| JEG-3, BeWo, and HTR-8/SVneo cells                                                                                                                                                | H/PF/2013                                                                               | MOI=0.1           | 27180225 |
| PHTs and hESC-derived trophoblasts                                                                                                                                                | Paraiba 2015                                                                            | MOI=1             | 29277269 |
| HTR-8/SVneo                                                                                                                                                                       | FSS13025                                                                                | MOI=1 or 5        | 29331320 |
| JAR and Vero cells,<br>Trophoblasts derived from hESCs                                                                                                                            | FSS13025, ib-<br>H30656, MexI-<br>44, MR766,<br>PANcdc259249,<br>SEN/1984/41525-<br>DAK | MOI=0.01          | 29985932 |
| Human placenta cell lines                                                                                                                                                         | PRVABC59                                                                                | MOI=2             | 28685770 |
| Jeg-3 cells                                                                                                                                                                       | Mex2-81                                                                                 | MOI=0.5           | 28099856 |
| Immortalized human trophoblast Sw.71<br>cells                                                                                                                                     | FSS13025                                                                                | MOI=20            | 27613665 |
| Trophoblast cell line, BeWo                                                                                                                                                       | ZIKV Brazil                                                                             | MOI=1             | 30003503 |
| hESC-derived day 8 cytotrophoblast and<br>syncytiotrophoblast<br><br>Primary cytotrophoblast from term birth<br><br>Syncytiotrophoblast differentiated primary<br>cytotrophoblast | MR766                                                                                   | MOI=0.14-<br>1.08 | 28193876 |
| JEG-3                                                                                                                                                                             | Paraiba 2015                                                                            | MOI=0.1           | 28694387 |

**Supplementary Table 2. Summary of the published *in vivo* studies of ZIKV infection during pregnancy.**

| Species                                                                                                                                                                                                                                                                                              | Stage              | Virus titers                                                                                       | Route of Inoculation                          | PMID     |
|------------------------------------------------------------------------------------------------------------------------------------------------------------------------------------------------------------------------------------------------------------------------------------------------------|--------------------|----------------------------------------------------------------------------------------------------|-----------------------------------------------|----------|
| <i>Ifnar1</i> <sup>-/-</sup> mice; WT mice+anti-ifnar                                                                                                                                                                                                                                                | E6.5, E7.5         | H/PF/2013 10 <sup>3</sup> FFU                                                                      | subcutaneous                                  | 27180225 |
| <i>Axl</i> <sup>-/-</sup> , <i>Mer</i> <sup>-/-</sup> , <i>Axl</i> <sup>-/-</sup> <i>Mer</i> <sup>-/-</sup> , <i>Axl</i> <sup>-/-</sup> <i>Tyro3</i> <sup>-/-</sup> mice+anti-ifnar                                                                                                                  | E6.5               | FSS13025 1.5X10 <sup>5</sup> PFU<br>Brazil 10 <sup>4</sup> FFU<br>MEX2-81 10 <sup>5</sup> PFU      | Vaginal<br>Intraperitoneal<br>Intracranially  | 28423319 |
| <i>Ifnar1</i> <sup>-/-</sup> mice                                                                                                                                                                                                                                                                    | E6, E9, E12        | ZIKV Brazil<br>10 <sup>3</sup> FFU                                                                 | subcutaneous                                  | 28910635 |
| <i>Ifnar1</i> <sup>-/-</sup> mice                                                                                                                                                                                                                                                                    | E5.5, E10.5, E15.5 | 1X10 <sup>5</sup> PFU                                                                              | intraperitoneal                               | 29117563 |
| WT mice                                                                                                                                                                                                                                                                                              | E9.5               | PRVABC59,<br>3.4X10 <sup>5</sup> PFU                                                               | intravenous                                   | 29634758 |
| C57BL/6J mice                                                                                                                                                                                                                                                                                        | E8.5               | PRVABC59, 1x10 <sup>4</sup> PFU                                                                    | intraperitoneal                               | 30210488 |
| C57BL/6 or SJL                                                                                                                                                                                                                                                                                       | E10–13             | ZIKV Brazil<br>5x10 <sup>2</sup> , 8x10 <sup>9</sup> or<br>2x10 <sup>11</sup> PFU ml <sup>-1</sup> | intravenous                                   | 27279226 |
| C57BL/6NCrl, <i>Rag2</i> <sup>-/-</sup> , <i>Ifnar1</i> <sup>-/-</sup> , <i>Irf3</i> <sup>-/-</sup> <i>Irf7</i> <sup>-/-</sup> , <i>Tlr7</i> <sup>-/-</sup> <i>Mx1</i> , <i>Mavs</i> <sup>-/-</sup> <i>Mx1</i> and <i>Tlr7</i> <sup>-/-</sup> <i>Mavs</i> / <i>Mx1</i> , <i>Mb21d</i> <sup>-/-</sup> | E4.5 or E8.5       | FSS13025, 2.5x10 <sup>4</sup> to 5.2x10 <sup>5</sup> PFU,<br>Or FSS13025, 1.5x10 <sup>5</sup> PFU  | Intravaginal infection<br><br>intraperitoneal | 27565347 |
| C57BL/6J or 129S1/SvImJ                                                                                                                                                                                                                                                                              | E14.5              | MEX1-44, 1.7x10 <sup>3</sup> TCID50                                                                | to embryonic brain                            | 27729407 |
| <i>Ifnar1</i> <sup>-/-</sup> female X C57BL/6 male<br><br>Or<br>C57BL/6 female X C57BL/6 male, treated with 1 mg                                                                                                                                                                                     | E5.5               | ZIKV-Dakar, 1x10 <sup>3</sup> FFU                                                                  | subcutaneous                                  | 27819683 |

|                                                                                                                    |                          |                                                                          |                          |          |
|--------------------------------------------------------------------------------------------------------------------|--------------------------|--------------------------------------------------------------------------|--------------------------|----------|
| injection of anti-Ifnar1 (MAR1-5A3)                                                                                |                          |                                                                          |                          |          |
| FVB/NJ and C57BL/6J                                                                                                | 5.5, 7.5, or 9.5 dpc     | HS-2015-BA-01, $1 \times 10^3$ to $1 \times 10^8$ PFU                    | intravenous              | 28231241 |
| <i>Ifnar1</i> <sup>-/-</sup>                                                                                       | Breed with infected male | MEX2-81, $1 \times 10^5$ PFU                                             |                          | 28472297 |
| C57BL/6                                                                                                            | E15                      | SZ01, 250 and 500 PFU                                                    | Intra-amniotic Injection | 28583742 |
| <i>Rag1</i> <sup>-/-</sup>                                                                                         | 7dpm                     | Paraiba 2015, $1 \times 10^4$ PFU                                        | intraperitoneal          | 28775298 |
| WT or Atg1611flox/flox X Cyp19-Cre                                                                                 | E9.5                     | Paraiba 2015, $1 \times 10^3$ FFU                                        | subcutaneous             | 28694387 |
| <i>Ifnar1</i> <sup>-/-</sup> or WT treated with anti-Ifnar1 blocking mouse mAb (MAR1-5A3)                          | E6, E9, or E12           | Paraiba 2015, $1 \times 10^3$ FFU                                        | subcutaneous             | 28910635 |
| <i>Ifnar1</i> <sup>-/-</sup> females X WT males<br>Or<br>WT treated with anti-Ifnar1 blocking mouse mAb (MAR1-5A3) | E6.5                     | Paraiba 2015, $1 \times 10^3$ FFU                                        | subcutaneous             | 28945244 |
| <i>Ifnar1</i> <sup>-/-</sup>                                                                                       | E5.5, E10.5 and E15.5    | FSS13025, $1 \times 10^5$ PFU                                            | intraperitoneal          | 29117563 |
| <i>Ifnar1</i> <sup>-/-</sup> female X <i>Ifnar1</i> <sup>+/-</sup> male                                            | E5.5 and E8.5            | FSS13025, $1.5 \times 10^5$ PFU                                          | intravaginal             | 29305462 |
| C57BL/6J                                                                                                           | E9.5 or E12.5            | PRVABC59, $3.4 \times 10^4$ , $1 \times 10^5$ , or $3.4 \times 10^5$ PFU | intravenous              | 29634758 |
| C57BL/6J or 129 mice                                                                                               | E14.5                    | MEX-1-44 or MR766, $3.4 \times 10^2$ TCID50                              | Intracranially           | 28993398 |

|                                                 |                                                             |                                                                                                 |                                              |          |
|-------------------------------------------------|-------------------------------------------------------------|-------------------------------------------------------------------------------------------------|----------------------------------------------|----------|
| hSTAT2 KI or WT female X hSTAT2 KI or WT female | E6.5                                                        | Dakar 41525, $1 \times 10^4$ to $1 \times 10^6$ PFU                                             | subcutaneous                                 | 29746837 |
| Rhesus macaques                                 | 31 days of gestation (dGA)<br>51 dGA<br>115 dGA             | PRVABC59, $1 \times 10^5$ FFU                                                                   | subcutaneous                                 | 29343712 |
| Macaque monkeys                                 | GD79, GD83 (~human 14 weeks)<br>GD68, GD72 (~human 9 weeks) | PRVABC59, $1 \times 10^5$ FFU<br>FSS13025, $1 \times 10^7$ PFU<br>SPH20152, $5 \times 10^5$ PFU | subcutaneous<br>subcutaneous<br>subcutaneous | 29967348 |

**Supplementary Table 3. Summary of the ZIKV titer in semen, testes and blood of human, mouse and non-human primates.**

| Species                        | Tissue type | Viral titer or vRNA copy number                                                                                    | Method of measurement | PMID     |
|--------------------------------|-------------|--------------------------------------------------------------------------------------------------------------------|-----------------------|----------|
| Human                          | Semen       | $2.9 \times 10^7$ ml <sup>-1</sup> and $1.1 \times 10^7$ ml <sup>-1</sup>                                          | QPCR                  | 25625872 |
| Human                          | Semen       | $2.9 \times 10^8$ ml <sup>-1</sup> and $3.5 \times 10^7$ ml <sup>-1</sup>                                          | QPCR                  | 27074370 |
| Human                          | Semen       | Up to $5 \times 10^4$ ml <sup>-1</sup> , and then ranging from $2 \times 10^3$ to $1 \times 10^4$ ml <sup>-1</sup> | QPCR                  | 27542178 |
| Human                          | Semen       | Up to $\sim 6.5 \times 10^8$ ml <sup>-1</sup>                                                                      | QPCR                  | 30405055 |
| Human                          | Semen       | $1.4 \times 10^7$ ml <sup>-1</sup>                                                                                 | QPCR                  | 30059980 |
| Human                          | Serum       | $2.8 \times 10^5$ ml <sup>-1</sup>                                                                                 | QPCR                  | 30059980 |
| Human                          | Semen       | Ranging from $1 \times 10^7$ to $2.5 \times 10^8$ ml <sup>-1</sup>                                                 | QPCR                  | 29641964 |
| Human                          | Semen       | Ranging from $8.03 \times 10^3$ to $2.55 \times 10^6$ ml <sup>-1</sup>                                             | QPCR                  | 28711704 |
| Human                          | Serum       | Up to $\sim 2.4 \times 10^4$ ml <sup>-1</sup>                                                                      | QPCR                  | 28838639 |
| Human                          | Semen       | Up to $\sim 1.5 \times 10^{10}$ ml <sup>-1</sup>                                                                   | QPCR                  | 28838639 |
| Human                          | Semen       | Up to $\sim 1.6 \times 10^9$ ml <sup>-1</sup>                                                                      | QPCR                  | 28813216 |
| Human                          | plasma      | Up to $\sim 4.5 \times 10^2$ ml <sup>-1</sup>                                                                      | QPCR                  | 29300893 |
| Human                          | Whole blood | Up to $\sim 5.0 \times 10^4$ ml <sup>-1</sup>                                                                      | QPCR                  | 28838639 |
| Human                          | Blood       | Up to $\sim 7.9 \times 10^3$ ml <sup>-1</sup>                                                                      | QPCR                  | 28813216 |
| Rhesus and cynomolgus macaques | Semen       | ranging from $3.4 \times 10^4$ to $1.1 \times 10^6$ ml <sup>-1</sup>                                               | QPCR                  | 27694931 |
| Rhesus macaques                | Plasma      | Ranging from $1.1 \times 10^4$ to $7.4 \times 10^4$ ml <sup>-1</sup>                                               | QPCR                  | 28667164 |
| Rhesus macaques                | Semen       | Up to $\sim 2.2 \times 10^3$ ml <sup>-1</sup>                                                                      | QPCR                  | 28667164 |
| AG129 mice                     | Semen       | Up to $\sim 6.3 \times 10^6$ gram <sup>-1</sup> tissue                                                             | plaque assay          | 28199846 |
| AG129 mice                     | Semen       | Ranging from $1.3 \times 10^4$ to $2.5 \times 10^6$ ml <sup>-1</sup>                                               | QPCR                  | 28985234 |

|                                   |                 |                                                                                    |              |          |
|-----------------------------------|-----------------|------------------------------------------------------------------------------------|--------------|----------|
| AG129 mice                        | seminal vesicle | Up to $\sim 5.0 \times 10^2$ gram <sup>-1</sup> tissue                             | plaque assay | 28199846 |
| AG129 mice                        | Testes          | Up to $\sim 2.5 \times 10^4$ gram <sup>-1</sup> tissue                             | plaque assay | 28199846 |
| AG129 mice                        | Testes          | Ranging from $1.0 \times 10^8$ to $2.0 \times 10^8$ gram <sup>-1</sup> tissue      | plaque assay | 30070988 |
| AG6 mice                          | Semen           | $\sim 1 \times 10^8$ gram <sup>-1</sup> total RNA                                  | QPCR         | 28680856 |
| <i>Ifnar1</i> <sup>-/-</sup> mice | Semen           | Ranging from $1 \times 10^6$ to $1 \times 10^{10}$ gram <sup>-1</sup> of total RNA | QPCR         | 28589934 |
| <i>Ifnar1</i> <sup>-/-</sup> mice | Semen           | Up to $\sim 1.1 \times 10^5$ ml <sup>-1</sup>                                      | QPCR         | 30053014 |
| <i>Ifnar1</i> <sup>-/-</sup> mice | Testes          | Up to $\sim 1 \times 10^5$ gram <sup>-1</sup> tissue                               | plaque assay | 28261663 |
| <i>Ifnar1</i> <sup>-/-</sup> mice | Testes          | Ranging from $1.5 \times 10^3$ to $6.6 \times 10^5$ gram <sup>-1</sup> tissue      | QPCR         | 30053014 |
| <i>Ifnar1</i> <sup>-/-</sup> mice | Testes          | Ranging from $3 \times 10^7$ to $1 \times 10^{12}$ gram <sup>-1</sup> of total RNA | QPCR         | 28589934 |

**Supplementary Table 4. Summary of sample ID used in clustering analysis acquired from public data source.**

| Figure of presence    | accession number of data set | sample group                             | sample name in Figure | accession number of sample |
|-----------------------|------------------------------|------------------------------------------|-----------------------|----------------------------|
| Fig. 2i               | GSE98423                     | <i>Ifnar</i> <sup>+/-</sup> , uninfected | 1_U20_1               | GSM2595175                 |
|                       |                              |                                          | 2_U20_2               | GSM2595179                 |
|                       |                              |                                          | 6_U20_9               | GSM2595180                 |
|                       |                              | <i>Ifnar</i> <sup>-/-</sup> , uninfected | 3_U20_3               | GSM2595176                 |
|                       |                              |                                          | 4_U20_4               | GSM2595181                 |
|                       |                              |                                          | 5_U20_8               | GSM2595182                 |
|                       |                              | <i>Ifnar</i> <sup>+/-</sup> , infected   | 19_ZV108_1            | GSM2595177                 |
|                       |                              |                                          | 23_ZV108_5            | GSM2595185                 |
|                       |                              |                                          | 25_ZV108_8            | GSM2595186                 |
|                       |                              |                                          | 17_ZV105_4            | GSM2595187                 |
|                       |                              |                                          | 18_ZV105_5            | GSM2595188                 |
|                       |                              | <i>Ifnar</i> <sup>-/-</sup> , infected   | 20_ZV108_2            | GSM2595178                 |
|                       |                              |                                          | 14_ZV105_1            | GSM2595183                 |
|                       |                              |                                          | 15_ZV105_2            | GSM2595184                 |
|                       |                              |                                          | 22_ZV108_4            | GSM2595189                 |
| 24_ZV108_7            | GSM2595190                   |                                          |                       |                            |
| Supplementary Fig. 1d | GSE66507                     | EPI2                                     | EPI2_1                | GSM1868817                 |
|                       |                              |                                          | EPI3_1                | GSM1624228                 |
|                       |                              |                                          | EPI4_1                | GSM1868818                 |
|                       |                              |                                          | EPI4_2                | GSM1868820                 |
|                       |                              |                                          | EPI4_3                | GSM1868823                 |
|                       |                              |                                          | EPI5_1                | GSM1868819                 |
|                       |                              |                                          | EPI5_2                | GSM1868822                 |
|                       |                              | EPI6_1                                   | GSM1868821            |                            |
| TE2                   | TE3_1                        | GSM1624224                               |                       |                            |

|  |          |      |       |            |           |
|--|----------|------|-------|------------|-----------|
|  |          |      | TE3_2 | GSM1624226 |           |
|  |          |      | TE3_3 | GSM1624225 |           |
|  |          |      | TE3_4 | GSM1624227 |           |
|  |          |      | TE3_5 | GSM1624223 |           |
|  |          |      | TE3_6 | GSM1868815 |           |
|  |          |      | TE4_1 | GSM1868816 |           |
|  |          |      | TE8_1 | GSM1624230 |           |
|  |          |      | TE8_2 | GSM1624236 |           |
|  |          |      | TE8_3 | GSM1624235 |           |
|  |          |      | TE8_4 | GSM1624222 |           |
|  |          |      | TE8_5 | GSM1624233 |           |
|  |          |      | TE8_6 | GSM1624231 |           |
|  |          |      | TE8_7 | GSM1624229 |           |
|  |          |      | TE8_8 | GSM1624234 |           |
|  |          |      | TE9_1 | GSM1624237 |           |
|  | GSE36552 | EPI1 | R1    | GSM922216  |           |
|  |          |      | H8    | GSM922213  |           |
|  |          |      | H1    | GSM922206  |           |
|  |          |      | H2    | GSM922207  |           |
|  |          |      | H3    | GSM922208  |           |
|  |          |      | TE1   | G13        | GSM922194 |
|  |          |      |       | G2         | GSM922195 |
|  |          |      |       | G3         | GSM922196 |
|  |          |      |       | G4         | GSM922197 |
|  |          |      |       | G5         | GSM922198 |
|  |          |      |       | G6         | GSM922199 |
|  |          |      |       | G7         | GSM922200 |
|  |          |      |       | G8         | GSM922201 |
|  |          |      |       | G9         | GSM922202 |



|  |  |  |     |           |
|--|--|--|-----|-----------|
|  |  |  | G10 | GSM922203 |
|  |  |  | G11 | GSM922204 |
|  |  |  | G12 | GSM922205 |
|  |  |  | H4  | GSM922209 |
|  |  |  | H5  | GSM922210 |
|  |  |  | H6  | GSM922211 |
|  |  |  | H7  | GSM922212 |
|  |  |  | H9  | GSM922214 |
|  |  |  | H10 | GSM922215 |

**Supplemental Table 5. Primers used for quantification of human and mouse genes.**

| Gene names                  | Forward primer               | Reverse primer         |
|-----------------------------|------------------------------|------------------------|
| <i>GATA3</i>                | ACATGCTGACCACGCCACG          | GCAGGGCTCTAACCCATGGC   |
| <i>FOXD3</i>                | GGGCAAGGGCAACTACTGGA         | GTAAGCGCCGAAGCTCTGCAT  |
| <i>EOMES</i>                | AGCTCTCCAAGGAGAAAGTG         | GCCTTCGCTTACAAGCACTG   |
| <i>CDX2</i>                 | CCCTCGGCAGCCAAGTGAAA         | TCCTCCGGATGGTGATGTAG   |
| <i>TEAD4</i>                | AGACCTTGCTGTGCATTGCC         | CTCCCCGAGTCTCTCATTCT   |
| <i>ELF5</i>                 | TAGGGAACAAGGAATTTTTCG<br>GG  | GTACACTAACCTTCGGTCAACC |
| <i>GCM1</i>                 | AAGAAGTCCTGCCTGGGTGT         | CGTGCCTCCAGAAGTTGGT    |
| <i>CGA</i>                  | CAACCGCCCTGAACACATCC         | CAGCAAGTGGACTCTGAGGTG  |
| <i>CGB</i>                  | TGAGATCACTTCACCGTGGTC<br>TCC | TTTATACCTCGGGGTTGTGGGG |
| <i>HLAG</i>                 | CAGATACCTGGAGAACGGGA         | CAGTATGATCTCCGCAGGGT   |
| <i>Human<br/>Beta-ACTIN</i> | ACCTTCTACAATGAGCTGCG         | CCTGGATAGCAACGTACATGG  |
| <i>Bax</i>                  | CTGACATGTTTGCTGATGGC         | GAAGTCCAGTGTCCAGCC     |
| <i>Bak1</i>                 | GGAGCAGAGTCATTCAGGTG         | CTCTGTGTCCTGGGCAAC     |
| <i>Bad</i>                  | AGGATGAGCGATGAGTTTGA<br>G    | CCTTTGCCCAAGTTTCGATC   |
| <i>Bim</i>                  | GTTCAACGAAACTTACACAAG<br>GAG | GTATCCTGGCTGCATGTAGATC |
| <i>Puma</i>                 | ACCTCAACGCGCAGTAC            | CCTAGTTGGGCTCCATTTCTG  |
| <i>Mouse<br/>Beta-Actin</i> | ACCTTCTACAATGAGCTGCG         | CTGGATGGCTACGTACATGC   |

**Supplemental Table 6. Primer/probe sets used for quantification of ZIKV genome.**

| Gene names                 | Forward primer                                                                               | Reverse primer        |
|----------------------------|----------------------------------------------------------------------------------------------|-----------------------|
| ZIKV<br>vRNA-RT            | <i>TACTTGTACAGCTCGTCCATGCCACTAACGTTCTTTTGCAGACAT</i>                                         |                       |
| ZIKV<br>vRNA-PCR           | CCGCTGCCCAACACAAG                                                                            | TACTTGTACAGCTCGTCCATG |
| ZIKV<br>vRNA-PCR<br>probe  | 5 <sup>'</sup> -/56-<br>FAM/AGCCTACCT/ZEN/TGACAAGCAATCAGACACTCAA/3IABkF<br>Q/-3 <sup>'</sup> |                       |
| Human<br>ACTB-RT           | CCTGGATAGCAACGTACATGG                                                                        |                       |
| Human<br>ACTB-PCR          | CCTTGCACATGCCGGAG                                                                            | ACAGAGCCTCGCCTTTG     |
| Human<br>ACTB-PCR<br>probe | 5 <sup>'</sup> -/5HEX/TCATCCATG/ZEN/GTGAGCTGGCGG/3IABkFQ/-3 <sup>'</sup>                     |                       |
| Mouse Actb<br>-PCR         | ATGCCGGAGCCGTTGTC                                                                            | GCGAGCACAGCTTCTTTG    |
| Mouse Actb<br>-PCR probe   | 5 <sup>'</sup> -/5HEX/CCGCCACCA/ZEN/GTTCGCCATG/3IABkFQ/-3 <sup>'</sup>                       |                       |
