# Supplementary material for: Pre- and peri-implantation Zika virus infection impairs fetal development by targeting trophectoderm cells
Source: PubMed Central journal article supplement (PMC6744420; doi:10.1038/s41467-019-12063-2), 2019-09-13
Supplement: 41467_2019_12063_MOESM2_ESM.pdf [file 41467_2019_12063_MOESM2_ESM.pdf]

## **Description of Additional Supplementary Files**

File Name: Supplementary Movie 1

Description: ZIKV infection (ZIKV E, red) and cell apoptosis (Cleaved Caspase 3/CAS3, white) in mouse trophectoderm (CDX2, green) was indicated by immunostaining at 24 hours post infection in MOCK infected mouse blastocysts.

File Name: Supplementary Movie 2

Description: ZIKV infection (ZIKV E, red) and cell apoptosis (Cleaved Caspase 3/CAS3, white) in mouse trophectoderm (CDX2, green) was indicated by immunostaining at 24 hours post infection with MR766 strain ZIKV ( $2 \times 10^4$  IFU ml<sup>-1</sup>) infected in mouse blastocysts.

File Name: Supplementary Movie 3

Description: ZIKV infection (ZIKV E, red) and cell apoptosis (Cleaved Caspase 3/CAS3, white) in mouse trophectoderm (CDX2, green) was indicated by immunostaining at 24 hours post infection with MR766 strain ZIKV ( $6 \times 10^4$  IFU ml<sup>-1</sup>) in mouse blastocysts.
